# Supplementary material for: Relationship between oral and gut microbiota in elderly people
Source: PubMed Central journal article supplement (PMC6688080; doi:10.1002/iid3.266), 2019-07-15

# Figure S1 Difference of fecal and oral microbiota between male and female subjects

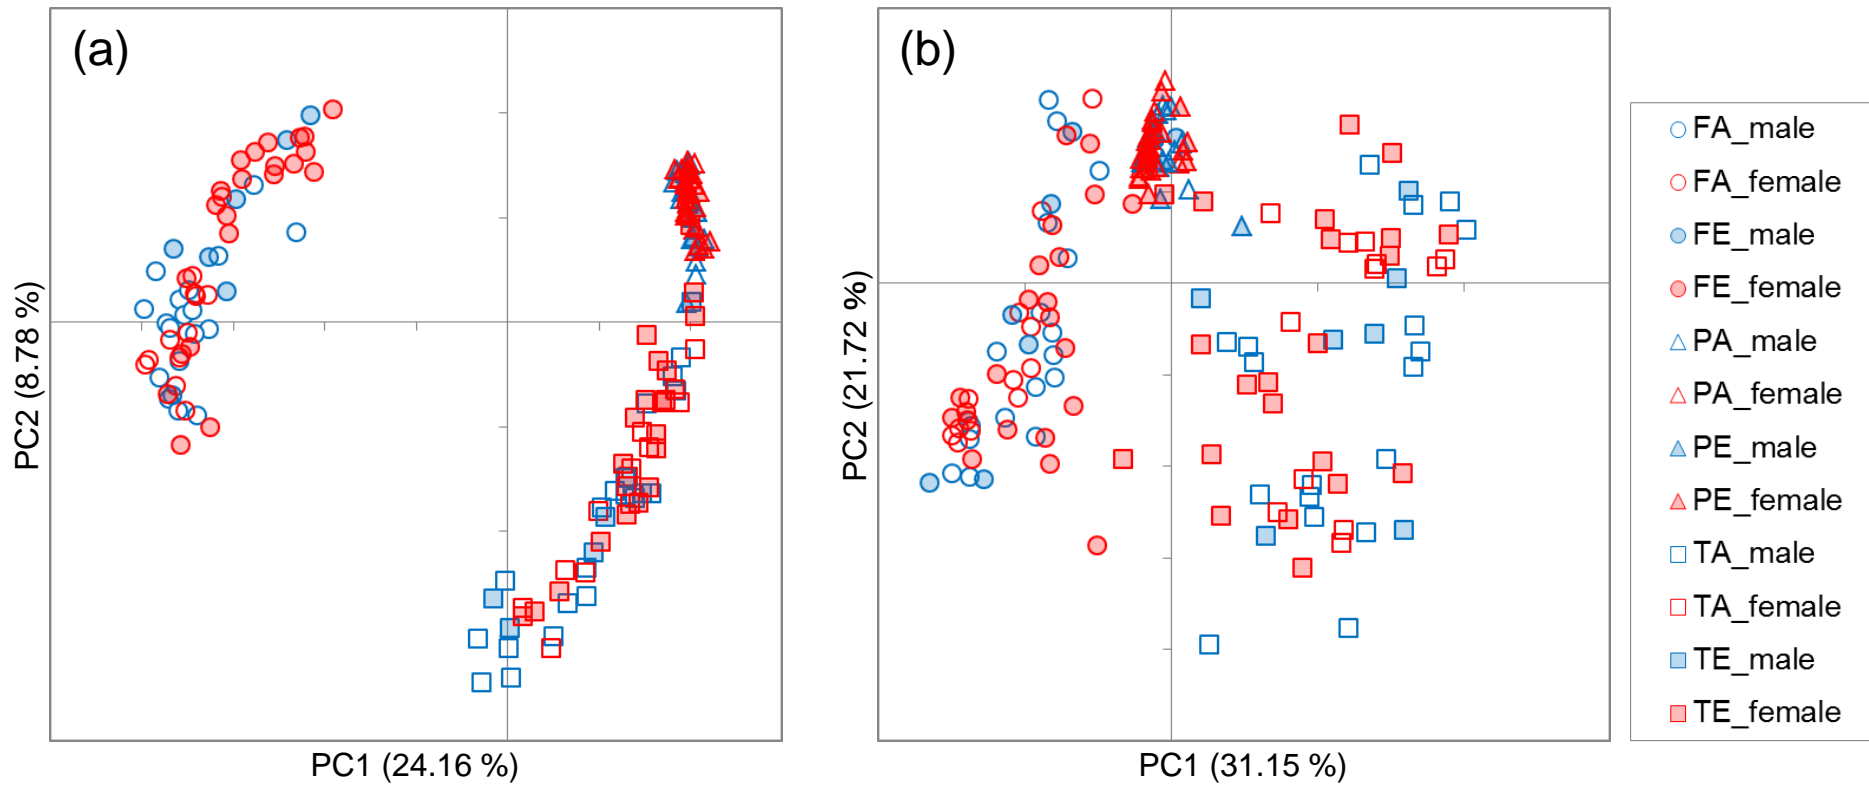

Supplement: IID3-7-229-s001.pdf [file IID3-7-229-s001.pdf]
